# Supplementary material
Source: PubMed Central journal article supplement (PMC2590641)
Supplement: NIHMS69096-supplement.pdf [file NIHMS69096-supplement.pdf]

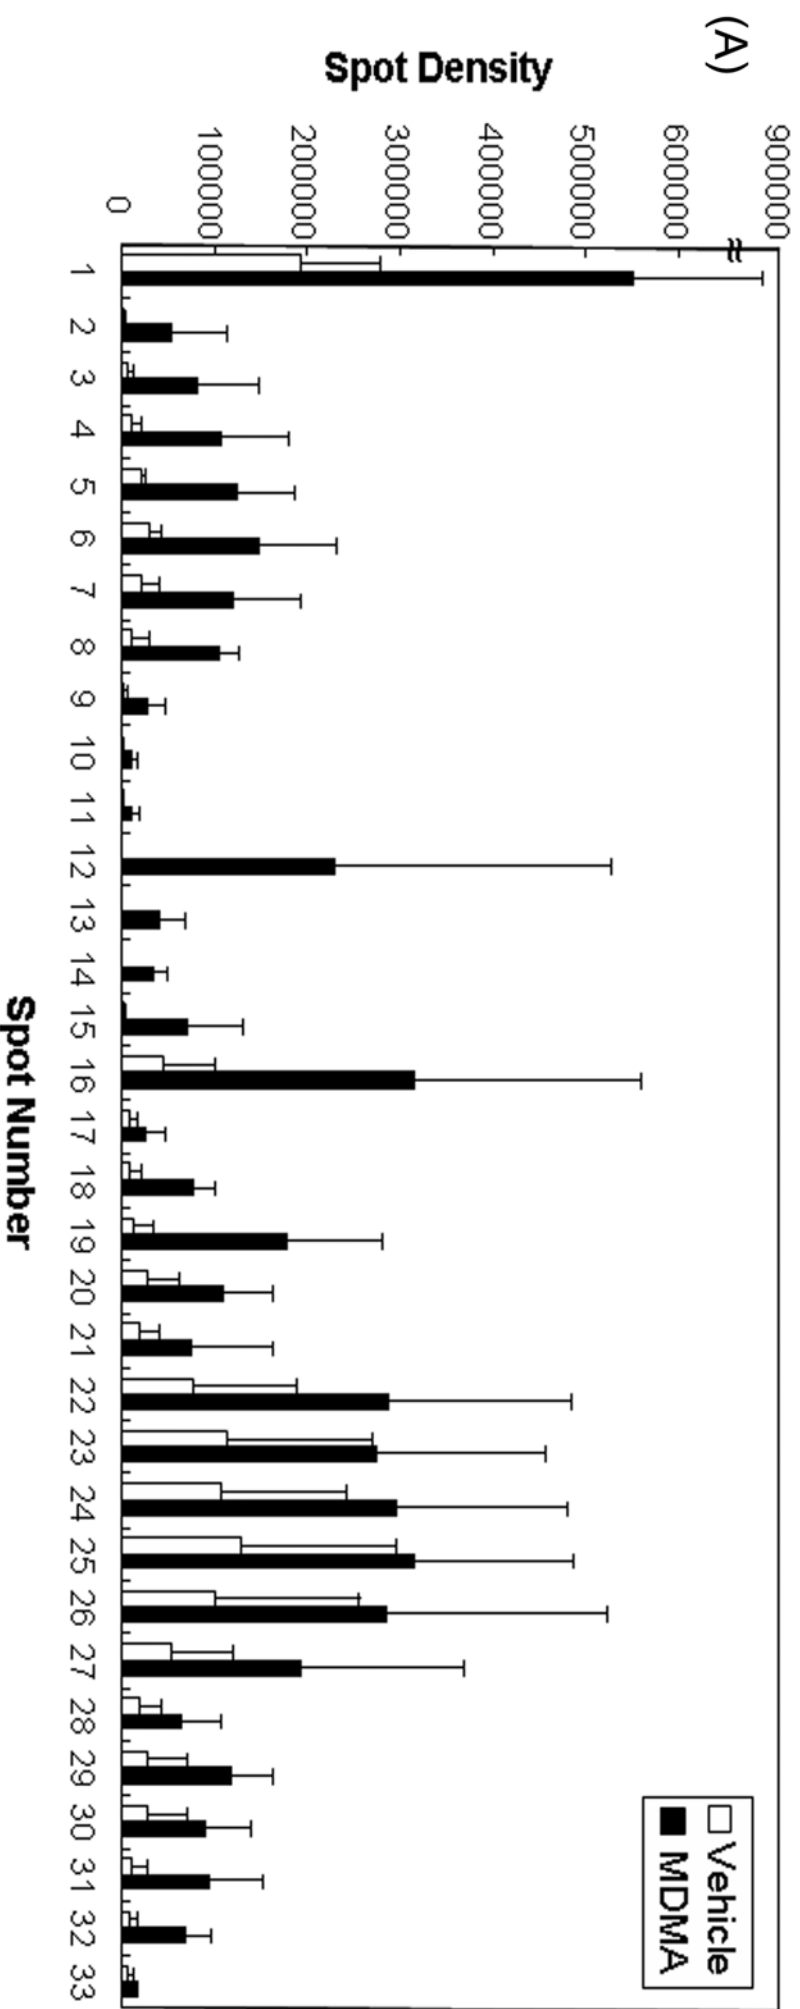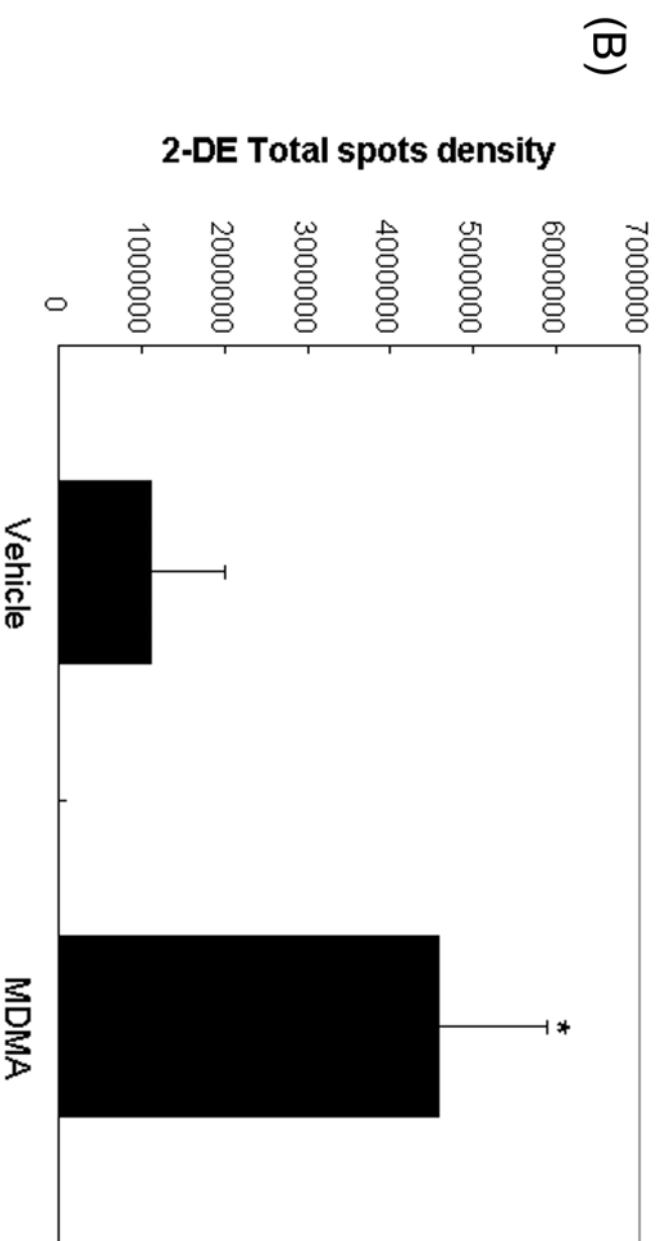

**Legend for Supplementary Figure 1.** Statistical analysis of the densities of individual spots. (A) The densities of individual protein spots from 3 independent 2-D gels as shown in Figure 2C were determined by using a gel digitizing software (UN-SCAN-IT™, Orem, Utah, USA) and compared with statistical analysis. (B) The densities of the entire protein spots in vehicle-treated versus MDMA-exposed samples are calculated and presented as total spot density. \*significantly different from the vehicle control (\* $p < 0.025$ ).

**Supplementary Table 1. Raw data of LC-MS/MS peptide sequence analyses for oxidized proteins in MDMA treated rat liver mitochondria.**

| Spot No. | Protein/<br>Peptide                              | Detect No.<br>of peptide | Z <sup>a)</sup> | X <sub>corr</sub> <sup>b)</sup> | Δ Cn <sup>c)</sup> | Swiss-Prot<br>Accession <sup>d)</sup> |
|----------|--------------------------------------------------|--------------------------|-----------------|---------------------------------|--------------------|---------------------------------------|
| 1        | <u>60 kDa heat shock protein (Hsp60)</u>         |                          |                 |                                 |                    |                                       |
|          | R.KPLVIIAEDVDGEALSTLVNLR.L                       | 13                       | 2               | 7.6207                          | 0.7383             | P63039                                |
|          | K.TLNDELEIIEGMK.F                                | 3                        | 2               | 4.6498                          | 0.5731             | P63039                                |
|          | K.VGEVIVTK.D                                     | 1                        | 2               | 2.9774                          | 0.3231             | P63039                                |
|          | K.VGGTSDVEVNEKK.D                                | 1                        | 2               | 2.6078                          | 0.1647             | P63039                                |
|          | K.VTKDGVTVAK.S                                   | 3                        | 2               | 3.453                           | 0.4325             | P63039                                |
|          | R.AAVEEGIVLGGGCALLR.C                            | 1                        | 2               | 4.9207                          | 0.6328             | P63039                                |
|          | R.CIPALDSLKPANEDQK.I                             | 1                        | 2               | 3.8211                          | 0.4922             | P63039                                |
|          | R.GVMLAVDAVIAELK.K                               | 2                        | 2               | 5.0957                          | 0.5004             | P63039                                |
|          | R.GVMLAVDAVIAELKK.Q                              | 1                        | 2               | 5.3811                          | 0.5273             | P63039                                |
|          | R.GYISPYFINTSK.G                                 | 1                        | 2               | 4.0739                          | 0.5575             | P63039                                |
|          | R.IQEITEQLDITTSEYEKEK.L                          | 1                        | 2               | 6.0948                          | 0.5976             | P63039                                |
|          | K.VGGTSDVEVNEK.K                                 | 4                        | 2               | 4.0032                          | 0.584              | P63039                                |
|          | R.RGVMLAVDAVIAELK.K                              | 1                        | 2               | 4.2009                          | 0.4497             | P63039                                |
|          | R.TALLDAAGVASLLTTAEAVVTEIPK.E                    | 4                        | 2               | 7.3176                          | 0.7573             | P63039                                |
|          | R.TALLDAAGVASLLTTAEAVVTEIPKEEK.D                 | 2                        | 3               | 5.6631                          | 0.6211             | P63039                                |
|          | R.TVIIQSWGSPK.V                                  | 1                        | 2               | 3.414                           | 0.4176             | P63039                                |
|          | R.VTDALNATR.A                                    | 1                        | 2               | 3.3133                          | 0.3296             | P63039                                |
|          | K.RIQEITEQLDITTSEYEK.E                           | 1                        | 2               | 5.7735                          | 0.5697             | P63039                                |
|          | R.IQEITEQLDITTSEYEK.E                            | 6                        | 2               | 5.6176                          | 0.6097             | P63039                                |
|          | K.IPAMTIK.N                                      | 1                        | 1               | 2.3153                          | 0.3583             | P63039                                |
|          | K.QSKPVTTPEEIAQVATISANGDK.D                      | 1                        | 2               | 4.6509                          | 0.5829             | P63039                                |
|          | K.CEFQDAYVLLSEK.K                                | 1                        | 2               | 3.7654                          | 0.6283             | P63039                                |
|          | K.ILQSSSEVGYDAMLGDFVNMVEK.G                      | 2                        | 2               | 6.1011                          | 0.6194             | P63039                                |
|          | K.ISSVQSIIVPALEIANHR.K                           | 5                        | 2               | 4.8671                          | 0.5879             | P63039                                |
|          | K.KISSVQSIIVPALEIANHR.K                          | 2                        | 2               | 5.484                           | 0.6284             | P63039                                |
|          | K.LNERLAKLSDGVAVLK.V                             | 1                        | 2               | 3.3701                          | 0.1199             | P63039                                |
|          | K.VGGTSDVEVNEKKDR.V                              | 1                        | 2               | 3.8491                          | 0.3752             | P63039                                |
|          | K.LSDGVAVLK.V                                    | 2                        | 1               | 3.2674                          | 0.3297             | P63039                                |
|          | K.LVQDVANNTNEEAGDGTATVLR.S                       | 10                       | 2               | 6.8439                          | 0.7179             | P63039                                |
|          | K.NAGVEGLIVEK.I                                  | 4                        | 1               | 4.2019                          | 0.512              | P63039                                |
|          | K.DIGNIISDAMK.K                                  | 1                        | 2               | 3.3737                          | 0.422              | P63039                                |
|          | <u>Stress-70 protein (GRP 75)</u>                |                          |                 |                                 |                    |                                       |
|          | R.EQQIVIQSSGGLSK.D                               | 1                        | 2               | 3.8664                          | 0.5437             | P48721                                |
|          | K.VQQTVDLDFGR.A                                  | 1                        | 2               | 3.7647                          | 0.4628             | P48721                                |
|          | K.ETAENYLGHTAK.N                                 | 1                        | 2               | 4.2066                          | 0.534              | P48721                                |
|          | K.LKEEISK.M                                      | 1                        | 1               | 2.1789                          | 0.1149             | P48721                                |
|          | K.LLGQFTLIGIPPAPR.G                              | 1                        | 2               | 3.2741                          | 0.5491             | P48721                                |
|          | K.NAVITVPAYFNDSQR.Q                              | 1                        | 2               | 3.1442                          | 0.5284             | P48721                                |
|          | K.SDIGEVILVGGMTR.M                               | 1                        | 2               | 4.7523                          | 0.4914             | P48721                                |
|          | K.DAGQISGLNVLV.V                                 | 1                        | 2               | 3.9935                          | 0.4781             | P48721                                |
|          | R.EGSGSSSTGEQKEDQKEEK.Q                          | 1                        | 2               | 3.5097                          | 0.5192             | P48721                                |
|          | R.QAASSLQQASLK.L                                 | 1                        | 2               | 3.378                           | 0.5472             | P48721                                |
|          | R.VINEPTAAALAYGLDK.S                             | 1                        | 2               | 5.6746                          | 0.5878             | P48721                                |
|          | <u>78 kDa glucose-regulated protein (GRP 78)</u> |                          |                 |                                 |                    |                                       |

|                        |   |   |        |        |        |
|------------------------|---|---|--------|--------|--------|
| K.ELEEIVQPIISK.L       | 1 | 2 | 4.2863 | 0.3722 | P06761 |
| R.IINEPTAAAIAYGLDK.R   | 1 | 2 | 4.1962 | 0.5961 | P06761 |
| K.SQIFSTASDNQPTVTIK.V  | 1 | 2 | 5.0439 | 0.5914 | P06761 |
| K.DNHLLGTFDLTGIPPAPR.G | 1 | 2 | 4.1005 | 0.5902 | P06761 |
| K.KSDIDEIVLVGGSTR.I    | 1 | 2 | 5.0493 | 0.5418 | P06761 |

2

Methylmalonate-semialdehyde dehydrogenase (ALDH6)

|                           |   |   |        |        |        |
|---------------------------|---|---|--------|--------|--------|
| K.QGIQFYTQLK.T            | 1 | 2 | 2.6217 | 0.4372 | Q02253 |
| K.ENTLNQLVGAAFGAAGQR.C    | 1 | 2 | 4.7754 | 0.5517 | Q02253 |
| R.AFPWADTSILSR.Q          | 1 | 2 | 3.9369 | 0.5361 | Q02253 |
| K.EGASILLDGR.K            | 1 | 2 | 2.818  | 0.4226 | Q02253 |
| K.EEIFGPVLVVLETETLDEAIK.I | 2 | 2 | 5.8385 | 0.6233 | Q02253 |
| R.VNAGDQPGADLGPLITPQAK.E  | 1 | 2 | 6.2929 | 0.7134 | Q02253 |
| K.SDKWIDIHNPATNEVVGR.V    | 1 | 3 | 3.5387 | 0.3788 | Q02253 |

Aldehyde dehydrogenase 2, mitochondrial (ALDH2)

|                             |   |   |        |        |        |
|-----------------------------|---|---|--------|--------|--------|
| R.GYFIQPTVFGDVK.D           | 1 | 2 | 3.8353 | 0.6029 | P11884 |
| K.VAFTGSTEVGHLIQVAAGSSNLK.R | 1 | 2 | 4.0198 | 0.4417 | P11884 |
| K.VAEQTPLTALYVANLIK.E       | 1 | 2 | 5.3256 | 0.5512 | P11884 |

Acyl-CoA oxidase 2

|                    |   |   |       |        |        |
|--------------------|---|---|-------|--------|--------|
| K.VESIIQSDPVFNLK.K | 2 | 2 | 2.847 | 0.1619 | P97562 |
|--------------------|---|---|-------|--------|--------|

Catalase

|                       |   |   |        |        |        |
|-----------------------|---|---|--------|--------|--------|
| R.GPLLVDVFTDEMAHFDR.E | 1 | 3 | 4.1792 | 0.5142 | P04762 |
| R.FNSANEDNVTQVR.T     | 1 | 2 | 2.5848 | 0.1182 | P04762 |

Glycerol-3-phosphate dehydrogenase

|                             |   |   |        |        |        |
|-----------------------------|---|---|--------|--------|--------|
| K.AVKLHNLNAGPSRTVGLFLQGGK.D | 2 | 2 | 3.8045 | 0.3153 | P35571 |
|-----------------------------|---|---|--------|--------|--------|

cGMP-dependent protein kinase 2

|                   |   |   |        |        |        |
|-------------------|---|---|--------|--------|--------|
| R.WLNGFNWEGLKAR.S | 2 | 2 | 3.5242 | 0.1663 | Q64595 |
|-------------------|---|---|--------|--------|--------|

Heat shock protein HSP 90-alpha (HSP 86)

|                       |   |   |        |        |        |
|-----------------------|---|---|--------|--------|--------|
| K.VILHLKEDQTEYLEERR.I | 2 | 2 | 2.6338 | 0.2387 | P82995 |
|-----------------------|---|---|--------|--------|--------|

Guanine deaminase

|                    |   |   |        |        |        |
|--------------------|---|---|--------|--------|--------|
| K.RFQSTDVAEEVYTR.V | 2 | 2 | 2.5856 | 0.1983 | Q9WTT6 |
|--------------------|---|---|--------|--------|--------|

Protein S100-A11 (S100 calcium-binding protein A11)

|                     |   |   |        |        |        |
|---------------------|---|---|--------|--------|--------|
| K.TEFLSFMNTELAFTK.N | 2 | 2 | 5.0091 | 0.5634 | Q6B345 |
|---------------------|---|---|--------|--------|--------|

Receptor tyrosine kinase

|                           |   |   |        |        |        |
|---------------------------|---|---|--------|--------|--------|
| R.ELQEKYVLEAECAVAGPGANK.E | 1 | 2 | 2.4108 | 0.0984 | Q9EPA1 |
| R.DSRKIGPAYVSSGGSR.N      | 1 | 2 | 2.7669 | 0.176  | Q9EPA1 |

Tuberin

|                  |   |   |        |        |        |
|------------------|---|---|--------|--------|--------|
| R.MIGQICDVAKTK.K | 2 | 2 | 3.7459 | 0.1425 | P49816 |
|------------------|---|---|--------|--------|--------|

3

Methylmalonate-semialdehyde dehydrogenase (ALDH6)

|                             |   |   |        |        |        |
|-----------------------------|---|---|--------|--------|--------|
| R.VNAGDQPGADLGPLITPQAK.E    | 3 | 2 | 5.7933 | 0.6404 | Q02253 |
| R.LITLEQGK.T                | 1 | 2 | 2.458  | 0.2473 | Q02253 |
| K.TLADAEGDVFR.G             | 1 | 2 | 3.539  | 0.5064 | Q02253 |
| K.AISFVGSNQAGEYIFER.G       | 2 | 2 | 5.5308 | 0.6281 | Q02253 |
| K.EEDATLSSPAVVMPTMGR.-      | 1 | 2 | 4.7709 | 0.6475 | Q02253 |
| K.QGIQFYTQLK.T              | 1 | 2 | 2.5793 | 0.3445 | Q02253 |
| K.IVNDNPYGNGTAFITTINGAIAR.K | 2 | 3 | 5.3114 | 0.5808 | Q02253 |
| K.ERVCNLIDSGAK.E            | 1 | 2 | 2.4819 | 0.1435 | Q02253 |
| K.EEIFGPVLVVLETETLDEAIK.I   | 1 | 2 | 6.2128 | 0.6642 | Q02253 |
| K.ENTLNQLVGAAFGAAGQR.C      | 1 | 2 | 5.3873 | 0.5526 | Q02253 |
| K.EGASILLDGR.K              | 1 | 2 | 3.0705 | 0.4943 | Q02253 |

Glutamate dehydrogenase 1 (GDH)

|                         |   |   |        |        |        |
|-------------------------|---|---|--------|--------|--------|
| K.YNLGLDLR.T            | 1 | 2 | 3.003  | 0.3352 | P10860 |
| K.PISQGGIHGR.I          | 1 | 2 | 3.3418 | 0.5461 | P10860 |
| K.DIVHSGLAYTMER.S       | 1 | 2 | 3.5548 | 0.5842 | P10860 |
| R.DDGSWEVIEGYR.A        | 1 | 2 | 3.3228 | 0.3989 | P10860 |
| R.YSTDVSVDEVK.A         | 1 | 2 | 2.785  | 0.4962 | P10860 |
| K.IIAEGANGPTTPEADK.I    | 1 | 2 | 4.5246 | 0.6296 | P10860 |
| K.HGGTIPVVPTAEFQDR.I    | 1 | 2 | 4.5531 | 0.5502 | P10860 |
| K.GFIGPGIDVPAPDMSTGER.E | 1 | 2 | 5.0887 | 0.5675 | P10860 |
| K.LQHGSILGFPK.A         | 1 | 2 | 3.0746 | 0.4256 | P10860 |

Aldehyde dehydrogenase 2, mitochondrial (ALDH2)

|                       |   |   |        |        |        |
|-----------------------|---|---|--------|--------|--------|
| R.TEQGPQVDETQFK.K     | 1 | 2 | 4.1576 | 0.523  | P11884 |
| K.VAEQTPLTALYVANLIK.E | 1 | 2 | 4.8228 | 0.5385 | P11884 |

4

Methylmalonate-semialdehyde dehydrogenase (ALDH6)

|                           |   |   |        |        |        |
|---------------------------|---|---|--------|--------|--------|
| K.ERVCNLIDSGAK.E          | 1 | 2 | 3.2637 | 0.339  | Q02253 |
| R.VNAGDQPGADLGPLITPQAK.E  | 2 | 2 | 5.4591 | 0.6188 | Q02253 |
| K.AISFVGSNQAGEYIFER.G     | 4 | 2 | 5.814  | 0.5721 | Q02253 |
| K.EEIFGPVLVVLETETLDEAIK.I | 1 | 2 | 6.3505 | 0.6358 | Q02253 |
| K.EGASILLDGR.K            | 1 | 2 | 2.8649 | 0.3499 | Q02253 |
| K.GYENGNFVGPTIISNVK.P     | 1 | 2 | 3.4155 | 0.4081 | Q02253 |
| K.IVNDNPYGNGTAFITNGAIAR.K | 1 | 2 | 4.8727 | 0.3413 | Q02253 |
| K.NHGVVMPDANK.E           | 1 | 2 | 2.537  | 0.4421 | Q02253 |
| R.AFPAWADTSILSR.Q         | 1 | 2 | 3.6409 | 0.5555 | Q02253 |
| K.ENTLNQLVGAAFGAAGQR.C    | 2 | 2 | 5.4859 | 0.5383 | Q02253 |
| K.EGASILLDGRK.I           | 1 | 2 | 2.9981 | 0.2872 | Q02253 |

Glutamate dehydrogenase 1 (GDH)

|                           |   |   |        |        |        |
|---------------------------|---|---|--------|--------|--------|
| R.DSNYHLLMSVQESLER.K      | 1 | 2 | 4.5297 | 0.556  | P10860 |
| K.IIAEGANGPTTPEADKIFLER.N | 1 | 2 | 5.0072 | 0.6525 | P10860 |
| K.KGFIGPGIDVPAPDMSTGER.E  | 1 | 2 | 4.7312 | 0.5125 | P10860 |
| K.LQHGSILGFPK.A           | 1 | 2 | 3.1139 | 0.5491 | P10860 |
| K.MVEGFFDR.G              | 1 | 2 | 2.9437 | 0.4398 | P10860 |
| K.IIAEGANGPTTPEADK.I      | 1 | 2 | 5.0412 | 0.5899 | P10860 |
| K.PISQGGIHGR.I            | 1 | 2 | 3.2678 | 0.4616 | P10860 |
| K.YNLGLDLR.T              | 1 | 2 | 3.0597 | 0.3094 | P10860 |
| R.GASIVEDKLVEDLK.T        | 1 | 2 | 4.4962 | 0.3469 | P10860 |
| R.YSTDVSVDEVK.A           | 1 | 2 | 3.1399 | 0.4807 | P10860 |
| K.NLNHVSYGR.L             | 1 | 2 | 3.0075 | 0.3897 | P10860 |
| K.VYNEAGVTFT.-            | 1 | 2 | 2.9866 | 0.4723 | P10860 |
| K.GFIGPGIDVPAPDMSTGER.E   | 1 | 2 | 4.1862 | 0.5906 | P10860 |
| K.HGGTIPVVPTAEFQDR.I      | 1 | 2 | 3.9621 | 0.5865 | P10860 |

UDP-glucose pyrophosphorylase 2

|                          |   |   |        |        |        |
|--------------------------|---|---|--------|--------|--------|
| R.LVEIAQVPK.A            | 1 | 2 | 3.0291 | 0.457  | Q4V8I9 |
| R.IDIPPGAVLENK.I         | 1 | 2 | 2.664  | 0.4352 | Q4V8I9 |
| R.GLPDNISVNLK.L          | 1 | 2 | 2.9249 | 0.4374 | Q4V8I9 |
| K.TLDGGLNVIQLETAVGAAIK.S | 1 | 2 | 5.8331 | 0.6195 | Q4V8I9 |
| K.SFENSLGINVPR.S         | 1 | 2 | 3.8766 | 0.5466 | Q4V8I9 |

Aldehyde dehydrogenase family 7 member A1 (ALDH7)

|                     |   |   |        |        |        |
|---------------------|---|---|--------|--------|--------|
| R.LFLHESIHDDEVDR.L  | 1 | 2 | 4.4321 | 0.5237 | Q64057 |
| K.QAVSMFVQAVEEAKK.E | 1 | 2 | 3.1355 | 0.4121 | Q64057 |
| K.QAVSMFVQAVEEAK.K  | 1 | 2 | 2.7107 | 0.3689 | Q64057 |

Aldehyde dehydrogenase X (ALDH X)

|                   |   |   |        |        |        |
|-------------------|---|---|--------|--------|--------|
| R.TFVEESYHEFLER.T | 1 | 2 | 3.7845 | 0.4495 | Q66HF8 |
| R.EEIFGPVQPLFK.F  | 1 | 2 | 3.8948 | 0.1438 | Q66HF8 |

|                                                                         |   |   |        |        |        |
|-------------------------------------------------------------------------|---|---|--------|--------|--------|
| K.VAFTGSTEVGHLIQK.A                                                     | 1 | 2 | 4.7423 | 0.3863 | Q66HF8 |
| <u>Voltage-dependent T-type calcium channel subunit alpha-1G (VSCC)</u> |   |   |        |        |        |
| R.SSPHSPWSAASSWTSR.R                                                    | 1 | 2 | 2.8195 | 0.0901 | O54898 |
| R.LPAPCPGLEPSWAK.D                                                      | 1 | 2 | 2.7095 | 0.1642 | O54898 |
| <u>ATP synthase subunit alpha (<math>\alpha</math>-ATP)</u>             |   |   |        |        |        |
| R.TGAIVDVPVGDDELLGR.V                                                   | 2 | 2 | 2.855  | 0.4351 | P15999 |

5

Methylmalonate-semialdehyde dehydrogenase (ALDH6)

|                             |   |   |        |        |        |
|-----------------------------|---|---|--------|--------|--------|
| K.EGASILLDGRK.I             | 1 | 2 | 2.7448 | 0.2658 | Q02253 |
| R.AFPAWADTSILSR.Q           | 1 | 2 | 3.6355 | 0.5766 | Q02253 |
| R.VNAGDQPGADLGPLITPQAK.E    | 3 | 2 | 5.0606 | 0.6325 | Q02253 |
| R.CMALSTAVLVGEAK.K          | 1 | 2 | 4.7898 | 0.4572 | Q02253 |
| K.AISFVGSNQAGEYIFER.G       | 2 | 2 | 5.456  | 0.5528 | Q02253 |
| K.DMDLYSYR.L                | 1 | 2 | 3.0057 | 0.379  | Q02253 |
| K.EEIFGPVLVVLETETLDEAIK.I   | 2 | 2 | 6.1454 | 0.6215 | Q02253 |
| K.QGIQFYTQLK.T              | 1 | 2 | 2.508  | 0.3504 | Q02253 |
| K.WIDIHNPATNEVVGR.V         | 1 | 2 | 4.9524 | 0.5711 | Q02253 |
| K.ERVCNLIDSGAK.E            | 1 | 2 | 2.9897 | 0.3985 | Q02253 |
| K.IVNDNPPYNGGTAIFTTNGAIAR.K | 1 | 3 | 4.4385 | 0.4943 | Q02253 |
| K.KWLPELVER.A               | 1 | 2 | 2.4382 | 0.2147 | Q02253 |
| K.NHGVMVPDANK.E             | 1 | 2 | 3.5507 | 0.5159 | Q02253 |
| K.ENTLNQLVGAAFGAAGQR.C      | 2 | 2 | 6.3451 | 0.5228 | Q02253 |
| K.TLADAEGDVFR.G             | 1 | 2 | 3.2427 | 0.5043 | Q02253 |
| K.EEDATLSSPAVVMPTMGR.-      | 1 | 2 | 4.0731 | 0.651  | Q02253 |

Glutamate dehydrogenase 1 (GDH)

|                          |   |   |        |        |        |
|--------------------------|---|---|--------|--------|--------|
| K.NLNHVSYGR.L            | 1 | 2 | 2.4692 | 0.4368 | P10860 |
| K.YNLGLDLR.T             | 1 | 2 | 2.884  | 0.357  | P10860 |
| R.DDGSWEVIEGYR.A         | 1 | 2 | 4.3075 | 0.5347 | P10860 |
| R.DSNYHLLMSVQESLER.K     | 1 | 2 | 5.2476 | 0.5036 | P10860 |
| R.ISATGR.G               | 1 | 1 | 2.1502 | 0.0949 | P10860 |
| K.IAEGANGPTTPEADKIFLER.N | 1 | 2 | 4.9451 | 0.6351 | P10860 |
| K.LQHGSILGFPK.A          | 1 | 2 | 2.9395 | 0.3589 | P10860 |
| R.GASIVEDKLVEDLK.T       | 1 | 2 | 4.3938 | 0.4108 | P10860 |
| K.HGGTIPVVPTAEFQDR.I     | 1 | 2 | 4.1241 | 0.5435 | P10860 |
| K.GFIGPGIDVPAPDMSTGER.E  | 1 | 2 | 5.2798 | 0.6496 | P10860 |
| K.IAEGANGPTTPEADK.I      | 1 | 2 | 5.346  | 0.5859 | P10860 |
| K.PISQGGIHGR.I           | 1 | 2 | 3.1668 | 0.448  | P10860 |

UDP-glucose pyrophosphorylase 2

|                          |   |   |        |        |        |
|--------------------------|---|---|--------|--------|--------|
| R.IDIPPGAVLENK.I         | 1 | 2 | 3.2596 | 0.5121 | Q4V8I9 |
| R.NENTFLDLTVQQIEHLNK.T   | 1 | 2 | 5.7907 | 0.3897 | Q4V8I9 |
| R.LVEIAQVPK.A            | 1 | 2 | 3.5686 | 0.4116 | Q4V8I9 |
| K.GTVIIIANHGDR.I         | 1 | 2 | 3.4661 | 0.377  | Q4V8I9 |
| R.GLPDNISSVLNK.L         | 1 | 2 | 3.3764 | 0.4546 | Q4V8I9 |
| K.TLDGGLNVIQLETAVGAAIK.S | 1 | 2 | 5.2171 | 0.6127 | Q4V8I9 |
| K.SFENSLGINVPR.S         | 1 | 2 | 3.8322 | 0.4939 | Q4V8I9 |
| K.IQRPPEDSIQPYEK.I       | 1 | 2 | 4.1281 | 0.4641 | Q4V8I9 |

ATP synthase subunit alpha ( $\alpha$ -ATP)

|                       |   |   |        |        |        |
|-----------------------|---|---|--------|--------|--------|
| R.TGAIVDVPVGDDELLGR.V | 1 | 2 | 4.1188 | 0.444  | P15999 |
| R.ILGADTSVDLEETGR.V   | 1 | 2 | 5.0911 | 0.6302 | P15999 |
| K.AVDSLVIPIGR.G       | 1 | 2 | 2.9782 | 0.4472 | P15999 |

Aldehyde dehydrogenase family 7 member A1 (ALDH 7)

|                     |   |   |        |        |        |
|---------------------|---|---|--------|--------|--------|
| K.QAVSMFVQAVEEAK.K  | 1 | 2 | 2.9013 | 0.3912 | Q64057 |
| K.QAVSMFVQAVEEAKK.E | 1 | 2 | 2.9985 | 0.5163 | Q64057 |

Aldehyde dehydrogenase X (ALDH X)

|                             |   |   |        |        |        |
|-----------------------------|---|---|--------|--------|--------|
| K.VAFTGSTEVGHLIQK.A         | 1 | 2 | 4.6674 | 0.4548 | Q66HF8 |
| R.TFVEESYHEFLER.T           | 1 | 2 | 4.5407 | 0.4762 | Q66HF8 |
| <u>Cytochrome P450 11B1</u> |   |   |        |        |        |
| K.STTQLMFLPKSLTRWTSTR.V     | 2 | 2 | 3.4692 | 0.3004 | P15393 |

6

Methylmalonate-semialdehyde dehydrogenase (ALDH6)

|                               |   |   |        |        |        |
|-------------------------------|---|---|--------|--------|--------|
| K.ENTLNQLVGAAFGAAGQR.C        | 1 | 2 | 5.8084 | 0.5544 | Q02253 |
| R.VNAGDQPGADLGPLITPQAK.E      | 2 | 2 | 5.4206 | 0.6446 | Q02253 |
| R.QQVLLRYQQLIK.E              | 1 | 2 | 3.3912 | 0.2958 | Q02253 |
| R.AKNLRVNAGDQPGADLGPLITPQAK.E | 1 | 3 | 5.2271 | 0.4714 | Q02253 |
| K.TLADAEGDVFR.G               | 1 | 2 | 2.6734 | 0.4508 | Q02253 |
| K.NLRVNAGDQPGADLGPLITPQAK.E   | 2 | 2 | 5.4553 | 0.6357 | Q02253 |
| K.AISFVGSNQAGEYIFER.G         | 1 | 2 | 5.7451 | 0.5444 | Q02253 |
| K.ERVCNLIDSGAK.E              | 1 | 2 | 3.9622 | 0.3547 | Q02253 |
| K.EGASILLDGRKIK.V             | 1 | 2 | 3.2206 | 0.3053 | Q02253 |
| K.EGASILLDGRK.I               | 2 | 2 | 2.8867 | 0.3269 | Q02253 |
| K.EGASILLDGRK.K               | 1 | 2 | 2.661  | 0.5011 | Q02253 |
| R.SSFRGDTNFGYK.Q              | 1 | 2 | 3.6297 | 0.3385 | Q02253 |
| K.LFIDGKFVESK.S               | 1 | 2 | 3.8052 | 0.465  | Q02253 |

Glutamate dehydrogenase 1 (GDH)

|                           |   |   |        |        |        |
|---------------------------|---|---|--------|--------|--------|
| R.TAAYVNAIEKVFK.V         | 1 | 2 | 4.3373 | 0.4297 | P10860 |
| K.FGKHGGTIPVVPTAEFQDR.I   | 1 | 2 | 4.7397 | 0.6185 | P10860 |
| K.AGVKINPK.N              | 2 | 2 | 2.6889 | 0.2784 | P10860 |
| K.AKIIAEGANGPTTPEADK.I    | 1 | 2 | 6.0673 | 0.5674 | P10860 |
| K.ELEDFKLQHGSLGFPA.A      | 1 | 3 | 3.3256 | 0.4964 | P10860 |
| R.YSTDVSVDEVK.A           | 1 | 2 | 3.3053 | 0.5119 | P10860 |
| R.TAAYVNAIEK.V            | 1 | 2 | 3.4737 | 0.4997 | P10860 |
| R.KFGKHGGTIPVVPTAEFQDR.I  | 1 | 2 | 4.8407 | 0.6675 | P10860 |
| R.GASIVEDKLVEDLK.T        | 1 | 2 | 4.7911 | 0.4472 | P10860 |
| K.HGGTIPVVPTAEFQDR.I      | 1 | 2 | 4.3361 | 0.5981 | P10860 |
| K.NYTDNELEKISR.R          | 1 | 2 | 3.5701 | 0.4377 | P10860 |
| K.INPKNYTDNELEK.I         | 1 | 2 | 3.3767 | 0.3601 | P10860 |
| K.IIAEGANGPTTPEADKIFLER.N | 1 | 2 | 4.5151 | 0.6152 | P10860 |
| K.VFKVYNEAGVTFT.-         | 1 | 2 | 4.0652 | 0.6444 | P10860 |

Cytochrome P450 11B1

|                                 |   |   |        |        |        |
|---------------------------------|---|---|--------|--------|--------|
| K.STTQLMFLPKSLTRWTSTR.V         | 2 | 2 | 3.5586 | 0.2964 | P15393 |
| UDP-glucose pyrophosphorylase 2 |   |   |        |        |        |
| R.INKESLLPIAK.D                 | 1 | 2 | 3.4295 | 0.3682 | Q4V8I9 |
| K.SFENSLGINVPR.S                | 1 | 2 | 2.6232 | 0.2071 | Q4V8I9 |

7

Methylmalonate-semialdehyde dehydrogenase (ALDH 6)

|                                   |   |   |        |        |        |
|-----------------------------------|---|---|--------|--------|--------|
| K.EGASILLDGRK.K                   | 1 | 2 | 2.4317 | 0.4109 | Q02253 |
| K.ERVCNLIDSGAK.E                  | 1 | 2 | 3.1361 | 0.3763 | Q02253 |
| K.EGASILLDGRK.I                   | 1 | 2 | 2.8884 | 0.31   | Q02253 |
| K.LFIDGKFVESK.S                   | 1 | 2 | 3.742  | 0.4971 | Q02253 |
| K.EEIFGPVLVVLETETLDEAIK.I         | 2 | 2 | 6.1282 | 0.6219 | Q02253 |
| K.EEDATLSSPAVVMPTMGR.-            | 1 | 2 | 4.7873 | 0.6503 | Q02253 |
| K.AISFVGSNQAGEYIFER.G             | 3 | 2 | 5.6029 | 0.6209 | Q02253 |
| K.ENTLNQLVGAAFGAAGQR.C            | 1 | 2 | 5.9357 | 0.5727 | Q02253 |
| K.KWLPELVER.A                     | 1 | 2 | 2.548  | 0.2056 | Q02253 |
| K.NHGVVMPDANK.E                   | 1 | 2 | 3.0354 | 0.5243 | Q02253 |
| K.NHGVVMPDANKENTLNQLVGAAFGAAGQR.C | 1 | 3 | 3.8942 | 0.4923 | Q02253 |
| K.NLRVNAGDQPGADLGPLITPQAK.E       | 1 | 2 | 4.8182 | 0.6241 | Q02253 |

|                                                             |   |   |        |        |        |
|-------------------------------------------------------------|---|---|--------|--------|--------|
| K.QGIQFYTQLK.T                                              | 1 | 2 | 2.609  | 0.4149 | Q02253 |
| K.SDKWIDIHNPATNEVVGR.V                                      | 1 | 2 | 5.6922 | 0.4266 | Q02253 |
| K.TLADAEGDVFR.G                                             | 1 | 2 | 2.7528 | 0.457  | Q02253 |
| R.AFPWADTSILSR.Q                                            | 1 | 2 | 4.4104 | 0.5908 | Q02253 |
| R.SSFRGDTNFGYK.Q                                            | 1 | 2 | 3.6436 | 0.3078 | Q02253 |
| R.VNAGDQPGADLGPLITPQAK.E                                    | 2 | 2 | 5.5936 | 0.6556 | Q02253 |
| R.YQQLIKENLK.E                                              | 1 | 2 | 3.4173 | 0.2569 | Q02253 |
| K.IVNDNPNYGNGTAFITTINGAIAR.K                                | 1 | 2 | 6.1122 | 0.5022 | Q02253 |
| <u>Glutamate dehydrogenase 1 (GDH)</u>                      |   |   |        |        |        |
| K.KGFIGPIDVPAPDMSTGER.E                                     | 1 | 2 | 5.0357 | 0.5807 | P10860 |
| R.YSTDVSVDEVK.A                                             | 1 | 2 | 3.0302 | 0.4353 | P10860 |
| R.GASIVEDKLVEDLK.T                                          | 1 | 2 | 5.2872 | 0.4192 | P10860 |
| K.VFKVYNEAGVTFT.-                                           | 1 | 2 | 3.8425 | 0.5116 | P10860 |
| K.LQHGSILGFPK.A                                             | 1 | 2 | 2.7525 | 0.4542 | P10860 |
| K.AGVKINPK.N                                                | 1 | 2 | 2.8167 | 0.2034 | P10860 |
| K.DIVHSGLAYTMER.S                                           | 1 | 2 | 3.3943 | 0.5133 | P10860 |
| K.IIAEGANGPTTPEADKIFLER.N                                   | 1 | 2 | 5.4506 | 0.6558 | P10860 |
| K.IIAEGANGPTTPEADK.I                                        | 1 | 2 | 5.2667 | 0.6085 | P10860 |
| K.HGGTIPVVPPTAEFQDR.I                                       | 1 | 2 | 4.4727 | 0.5707 | P10860 |
| K.GFIGPIDVPAPDMSTGER.E                                      | 1 | 2 | 4.5232 | 0.5448 | P10860 |
| K.ELEDFKLQHGSILGFPK.A                                       | 1 | 2 | 3.6308 | 0.5614 | P10860 |
| <u>UDP-glucose pyrophosphorylase 2</u>                      |   |   |        |        |        |
| K.IQRPPEDSIQPYEK.I                                          | 1 | 2 | 3.7325 | 0.435  | Q4V8I9 |
| R.LVEIAQVPK.A                                               | 1 | 2 | 2.9725 | 0.3593 | Q4V8I9 |
| R.INKESLLPIAK.D                                             | 1 | 2 | 3.424  | 0.4015 | Q4V8I9 |
| K.TLDGGLNVIQLETAVGAAIK.S                                    | 1 | 2 | 5.9884 | 0.6492 | Q4V8I9 |
| K.SFENSLGINVPR.S                                            | 1 | 2 | 4.2744 | 0.52   | Q4V8I9 |
| <u>ATP synthase subunit alpha (<math>\alpha</math>-ATP)</u> |   |   |        |        |        |
| R.ILGADTSVDLEETGR.V                                         | 1 | 2 | 5.2315 | 0.6445 | P15999 |
| R.VVDALGNAIDGKGPVGSK.I                                      | 1 | 2 | 4.2976 | 0.6056 | P15999 |
| R.TGAIVDVPPVGDPELLGR.V                                      | 1 | 2 | 4.6265 | 0.4475 | P15999 |
| <u>Fumarate hydratase</u>                                   |   |   |        |        |        |
| R.AAAEVNQEYGLDPK.I                                          | 1 | 2 | 4.4886 | 0.4981 | P14408 |
| R.IYELAAGGTAVGTGLNTR.I                                      | 1 | 2 | 5.4665 | 0.5704 | P14408 |

8

|                                                           |   |   |        |        |        |
|-----------------------------------------------------------|---|---|--------|--------|--------|
| <u>Methylmalonate-semialdehyde dehydrogenase (ALDH 6)</u> |   |   |        |        |        |
| K.LFIDGKFVESK.S                                           | 1 | 2 | 3.4131 | 0.3908 | Q02253 |
| K.AISFVGSNQAGEYIFER.G                                     | 2 | 2 | 5.7184 | 0.5911 | Q02253 |
| K.EEIFGPVLVVLETETLDEAIK.I                                 | 2 | 2 | 6.5744 | 0.6837 | Q02253 |
| K.EGASILLDGR.K                                            | 1 | 2 | 3.1995 | 0.5421 | Q02253 |
| K.EGASILLDGRK.I                                           | 2 | 2 | 3.0907 | 0.2951 | Q02253 |
| K.ENTLNQLVGAAFGAAGQR.C                                    | 1 | 2 | 6.0955 | 0.5517 | Q02253 |
| K.ERVCNLIDSGAK.E                                          | 1 | 2 | 3.5083 | 0.3769 | Q02253 |
| K.IVNDNPNYGNGTAFITTINGAIAR.K                              | 2 | 2 | 6.1896 | 0.5747 | Q02253 |
| R.AFPWADTSILSR.Q                                          | 1 | 2 | 4.0197 | 0.5299 | Q02253 |
| R.SSFRGDTNFGYK.Q                                          | 1 | 2 | 3.4954 | 0.3515 | Q02253 |
| R.VNAGDQPGADLGPLITPQAK.E                                  | 2 | 2 | 5.4402 | 0.6252 | Q02253 |
| <u>Cytochrome P450 11B1</u>                               |   |   |        |        |        |
| K.STTQLMFLPKSLTRWTSTR.V                                   | 3 | 2 | 3.6317 | 0.3485 | P15393 |
| <u>Fumarate hydratase</u>                                 |   |   |        |        |        |
| K.VAALTGLPFVTAPNK.F                                       | 1 | 2 | 2.7815 | 0.2678 | P14408 |
| R.IYELAAGGTAVGTGLNTR.I                                    | 1 | 2 | 5.4496 | 0.5782 | P14408 |
| R.AAAEVNQEYGLDPK.I                                        | 1 | 2 | 4.0127 | 0.5853 | P14408 |
| <u>Cytochrome P450 19A1</u>                               |   |   |        |        |        |



|                                                           |   |   |        |        |        |
|-----------------------------------------------------------|---|---|--------|--------|--------|
| K.SSSMVHVMKHSNYISRFGSK.R                                  | 2 | 2 | 3.0266 | 0.2423 | P22443 |
| <b>9</b>                                                  |   |   |        |        |        |
| <u>Methylmalonate-semialdehyde dehydrogenase (ALDH 6)</u> |   |   |        |        |        |
| K.ENTLNQLVGAAFGAAGQR.C                                    | 1 | 2 | 6.124  | 0.5371 | Q02253 |
| K.EGASILLDGRK.I                                           | 1 | 2 | 2.6735 | 0.2702 | Q02253 |
| K.EGASILLDGR.K                                            | 1 | 2 | 2.5816 | 0.4844 | Q02253 |
| K.EEIFGPVLVVLETETLDEAIK.I                                 | 3 | 2 | 6.8553 | 0.6406 | Q02253 |
| K.AISFVGSNQAGEYIFER.G                                     | 3 | 2 | 5.3742 | 0.6241 | Q02253 |
| K.LFIDGK.F                                                | 1 | 1 | 2.1902 | 0.1012 | Q02253 |
| K.QGIQFYTQLK.T                                            | 1 | 2 | 2.6478 | 0.3513 | Q02253 |
| R.VNAGDQPGADLGPLITPQAK.E                                  | 1 | 2 | 5.4255 | 0.6336 | Q02253 |
| K.TLADAEGDVFR.G                                           | 1 | 2 | 3.1989 | 0.5064 | Q02253 |
| K.WIDIHNPATNEVVGR.V                                       | 1 | 2 | 4.3699 | 0.4962 | Q02253 |
| K.ERVCNLIDSGAK.E                                          | 1 | 2 | 3.5566 | 0.4576 | Q02253 |
| R.AFPAWADTSILSR.Q                                         | 1 | 2 | 3.4772 | 0.5163 | Q02253 |
| R.SSFRGDTNFYGGK.Q                                         | 1 | 2 | 3.2536 | 0.2865 | Q02253 |
| <u>Cytochrome P450 11B1</u>                               |   |   |        |        |        |
| .STTQLMFLPKSLTRWTSTR.V                                    | 2 | 2 | 3.4541 | 0.3621 | P15393 |
| <b>10</b>                                                 |   |   |        |        |        |
| <u>3-ketoacyl-CoA thiolase</u>                            |   |   |        |        |        |
| K.DFTATDLTEFAAR.A                                         | 1 | 2 | 5.419  | 0.6942 | P13437 |
| K.RTPFGAYGGLLK.D                                          | 1 | 2 | 2.77   | 0.1415 | P13437 |
| K.SLDLDPK.T                                               | 1 | 2 | 2.4202 | 0.363  | P13437 |
| K.TNVSGGAIALGHPLGGSGSR.I                                  | 1 | 2 | 6.2032 | 0.5827 | P13437 |
| R.ITAHLVHEL.R                                             | 1 | 2 | 3.6541 | 0.3645 | P13437 |
| R.VGVPTETGALTLNR.L                                        | 1 | 2 | 3.1396 | 0.49   | P13437 |
| R.GVFIVAAK.R                                              | 1 | 1 | 2.2057 | 0.2267 | P13437 |
| <u>Methylmalonate-semialdehyde dehydrogenase (ALDH 6)</u> |   |   |        |        |        |
| K.AISFVGSNQAGEYIFER.G                                     | 1 | 2 | 5.0246 | 0.5867 | Q02253 |
| R.VNAGDQPGADLGPLITPQAK.E                                  | 1 | 2 | 4.543  | 0.596  | Q02253 |
| K.ENTLNQLVGAAFGAAGQR.C                                    | 2 | 2 | 6.2516 | 0.5482 | Q02253 |
| K.EGASILLDGR.K                                            | 1 | 2 | 2.9068 | 0.4351 | Q02253 |
| K.EEIFGPVLVVLETETLDEAIK.I                                 | 1 | 2 | 6.6297 | 0.671  | Q02253 |
| <u>Acetyl-CoA dehydrogenase, short chain</u>              |   |   |        |        |        |
| R.LVIAGHLLR.S                                             | 1 | 2 | 3.1588 | 0.4164 | Q6IMX3 |
| R.ITEIYEGTSEIQR.L                                         | 1 | 2 | 4.7641 | 0.5473 | Q6IMX3 |
| K.ELVPIAAQLDK.E                                           | 1 | 2 | 3.2331 | 0.4552 | Q6IMX3 |
| <u>Glutamate dehydrogenase 1 (GDH)</u>                    |   |   |        |        |        |
| K.LQHGSILGFPK.A                                           | 1 | 2 | 2.6833 | 0.3447 | P10860 |
| K.IIAEGANGPTTPEADK.I                                      | 1 | 2 | 5.2593 | 0.5752 | P10860 |
| <u>Long-chain specific acyl-CoA dehydrogenase</u>         |   |   |        |        |        |
| K.TVAHIQTVQHK.L                                           | 1 | 2 | 3.3633 | 0.4431 | P15650 |
| R.LPASALLGEENK.G                                          | 1 | 2 | 4.2927 | 0.5248 | P15650 |
| <b>11</b>                                                 |   |   |        |        |        |
| <u>3-ketoacyl-CoA thiolase</u>                            |   |   |        |        |        |
| K.EGTVTAGNASGMSDGAGVVIIASEDAVKK.H                         | 1 | 3 | 3.4615 | 0.4853 | P13437 |
| K.DFTATDLTEFAAR.A                                         | 1 | 2 | 5.3253 | 0.6616 | P13437 |
| K.RTPFGAYGGLLK.D                                          | 1 | 2 | 3.827  | 0.3748 | P13437 |
| K.AANEAGYFNEEMAPIEVK.T                                    | 2 | 2 | 4.2768 | 0.5547 | P13437 |
| K.LEDTLWAGLTDQHVK.L                                       | 1 | 2 | 5.7208 | 0.5379 | P13437 |
| K.LPMGMTAENLAAK.Y                                         | 1 | 2 | 3.9397 | 0.4146 | P13437 |

|                                                           |   |   |        |         |        |
|-----------------------------------------------------------|---|---|--------|---------|--------|
| R.TPFGAYGGLLK.D                                           | 1 | 2 | 3.3644 | 0.4288  | P13437 |
| R.YALQSQR.W                                               | 1 | 1 | 2.1982 | 0.2139  | P13437 |
| K.TNVSOGAIALGHPLGGSGSR.I                                  | 2 | 2 | 6.3526 | 0.6614  | P13437 |
| R.VGVPTETGALTLNR.L                                        | 1 | 2 | 3.8353 | 0.4987  | P13437 |
| <u>Methylmalonate-semialdehyde dehydrogenase (ALDH 6)</u> |   |   |        |         |        |
| K.TLADAEGDVFR.G                                           | 1 | 2 | 3.7866 | 0.4826  | Q02253 |
| K.NHGVVMPDANK.E                                           | 1 | 2 | 2.9319 | 0.4123  | Q02253 |
| K.IVNDNYPYGNGTAFITNGAIAR.K                                | 1 | 2 | 5.3066 | 0.4171  | Q02253 |
| K.ERVCNLDISGAK.E                                          | 1 | 2 | 3.663  | 0.4259  | Q02253 |
| K.ENTLNQLVGAAFGAAGQR.C                                    | 1 | 2 | 5.6597 | 0.5631  | Q02253 |
| K.EGASILLDGR.K                                            | 1 | 2 | 2.4038 | 0.4008  | Q02253 |
| K.AISFVGSNQAGEYIFER.G                                     | 1 | 2 | 5.4729 | 0.565   | Q02253 |
| R.VNAGDQPGADLGPLITPQAK.E                                  | 1 | 2 | 5.9121 | 0.6297  | Q02253 |
| <u>Glutamate dehydrogenase 1 (GDH)</u>                    |   |   |        |         |        |
| K.YNLGLDLR.T                                              | 1 | 2 | 2.7723 | 0.42821 | P10860 |
| K.LQHGSILGFPK.A                                           | 1 | 2 | 2.8385 | 0.3682  | P10860 |
| K.IIAEGANGPTTPEADKIFLER.N                                 | 1 | 2 | 5.1588 | 0.7178  | P10860 |
| K.HGGTIPVVPTAEFQDR.I                                      | 1 | 2 | 4.4922 | 0.5341  | P10860 |
| <u>Fumarate hydratase</u>                                 |   |   |        |         |        |
| R.IYELAAGGTAVGTGLNTR.I                                    | 1 | 2 | 5.7031 | 0.5611  | P14408 |
| R.AAAEVNQEYGLDPK.I                                        | 1 | 2 | 4.7912 | 0.4844  | P14408 |
| K.AADEVAEGK.L                                             | 1 | 1 | 2.6719 | 0.3735  | P14408 |
| <u>Acetyl-CoA acetyltransferase</u>                       |   |   |        |         |        |
| R.TPIGSFLGSLASQPATK.L                                     | 1 | 2 | 5.5544 | 0.6176  | P17764 |
| K.FANEITPITISVK.G                                         | 1 | 2 | 4.0308 | 0.3902  | P17764 |
| <u>Medium-chain specific acyl-CoA dehydrogenase</u>       |   |   |        |         |        |
| K.IYQIYEGTAQIQR.L                                         | 1 | 2 | 4.8132 | 0.5532  | P08503 |
| R.TRPTVAAGAVGLAQR.A                                       | 1 | 2 | 4.5159 | 0.4403  | P08503 |

12

|                                |   |   |        |        |        |
|--------------------------------|---|---|--------|--------|--------|
| <u>3-ketoacyl-CoA thiolase</u> |   |   |        |        |        |
| R.VGVPTETGALTLNR.L             | 1 | 2 | 3.7366 | 0.4848 | P13437 |

13

|                                                 |   |   |        |        |        |
|-------------------------------------------------|---|---|--------|--------|--------|
| <u>Probable oxidoreductase</u>                  |   |   |        |        |        |
| K.INVAVDR.L                                     | 1 | 1 | 2.2654 | 0.111  | Q68FT3 |
| K.RISQLDTQSPVK.I                                | 1 | 2 | 3.8189 | 0.4538 | Q68FT3 |
| R.ISQLDTQSPVK.I                                 | 1 | 2 | 3.9854 | 0.3707 | Q68FT3 |
| R.VQGVVLQGGEEVR.S                               | 1 | 2 | 4.4476 | 0.5192 | Q68FT3 |
| <u>3-ketoacyl-CoA thiolase</u>                  |   |   |        |        |        |
| R.VGVPTETGALTLNR.L                              | 1 | 2 | 3.2398 | 0.4721 | P13437 |
| K.DFTATDLTEFAAR.A                               | 1 | 2 | 5.0694 | 0.6553 | P13437 |
| K.TNVSOGAIALGHPLGGSGSR.I                        | 1 | 2 | 6.7383 | 0.6084 | P13437 |
| <u>Acetyl-CoA dehydrogenase, short chain</u>    |   |   |        |        |        |
| R.LVIAGHLLR.S                                   | 1 | 2 | 2.6135 | 0.3622 | Q6IMX3 |
| R.ITEIYEGTSEIQR.L                               | 1 | 2 | 4.7519 | 0.575  | Q6IMX3 |
| R.IGIASQALGIAQASLDCAVK.Y                        | 1 | 2 | 6.2631 | 0.6984 | Q6IMX3 |
| <u>Protein disulfide-isomerase A6 precursor</u> |   |   |        |        |        |
| K.LAAVDATVNQVLASR.Y                             | 1 | 2 | 5.3954 | 0.3578 | Q63081 |
| K.AASALKDVVK.V                                  | 1 | 2 | 2.773  | 0.3279 | Q63081 |
| R.TGEAIVDAALSALR.Q                              | 1 | 2 | 4.2672 | 0.4573 | Q63081 |
| <u>3-ketoacyl-CoA thiolase A, peroxisomal</u>   |   |   |        |        |        |
| R.IAQFLSGIPETVPLSAVNR.Q                         | 1 | 2 | 5.7625 | 0.6655 | P21775 |
| K.AEELGLPILGVLR.S                               | 1 | 2 | 4.0844 | 0.4787 | P21775 |

Peroxisomal delta3, delta2-enoyl-CoA isomerase

|                          |   |   |        |        |        |
|--------------------------|---|---|--------|--------|--------|
| R.QNYVDLVSSLSSSEASSQGK.G | 1 | 2 | 5.9388 | 0.6683 | Q5XIC0 |
| K.GILVTSEGGITK.I         | 1 | 2 | 4.3499 | 0.552  | Q5XIC0 |

14

Acetyl-CoA dehydrogenase, short chain

|                          |   |   |        |        |        |
|--------------------------|---|---|--------|--------|--------|
| K.ELVPAAQLDK.E           | 1 | 2 | 2.6214 | 0.4453 | Q6IMX3 |
| R.LVIAGHLLR.S            | 1 | 2 | 3.0022 | 0.332  | Q6IMX3 |
| R.ITEIYEGTSEIQR.L        | 1 | 2 | 4.7853 | 0.5559 | Q6IMX3 |
| R.IGIASQALGIAQASLDCAVK.Y | 1 | 2 | 5.8309 | 0.6668 | Q6IMX3 |

3-ketoacyl-CoA thiolase

|                          |   |   |        |        |        |
|--------------------------|---|---|--------|--------|--------|
| K.TNVSGGAIALGHPLGGSGSR.I | 1 | 2 | 5.6272 | 0.635  | P13437 |
| R.VGVPTETGALTLNR.L       | 1 | 2 | 3.7183 | 0.4527 | P13437 |
| K.DFTATDLTEFAAR.A        | 1 | 2 | 4.6431 | 0.6813 | P13437 |

Peroxisomal delta3, delta2-enoyl-CoA isomerase

|                          |   |   |        |        |        |
|--------------------------|---|---|--------|--------|--------|
| K.LHAVNEEECTTLR.A        | 1 | 2 | 3.3801 | 0.3344 | Q5XIC0 |
| K.GILVTSEGGITK.I         | 1 | 2 | 4.3336 | 0.5653 | Q5XIC0 |
| R.QNYVDLVSSLSSSEASSQGK.G | 1 | 2 | 6.1104 | 0.6811 | Q5XIC0 |

Glutamate dehydrogenase 1 (GDH)

|                     |   |   |        |        |        |
|---------------------|---|---|--------|--------|--------|
| K.IAEGANGPTTPEADK.I | 1 | 2 | 5.2396 | 0.5974 | P10860 |
| K.NLNHVSYGRL        | 1 | 2 | 2.9458 | 0.3735 | P10860 |

Methylmalonate-semialdehyde dehydrogenase (ALDH 6)

|                          |   |   |        |        |        |
|--------------------------|---|---|--------|--------|--------|
| K.AISFVGSNQAGEYIFER.G    | 1 | 2 | 4.5139 | 0.6086 | Q02253 |
| R.VNAGDQPGADLGPLITPQAK.E | 1 | 2 | 5.4548 | 0.6104 | Q02253 |

15

60 kDa heat shock protein (Hsp60)

|                   |   |   |        |        |        |
|-------------------|---|---|--------|--------|--------|
| K.VGGTSDVEVNEKK.D | 1 | 2 | 3.7117 | 0.3804 | P63039 |
| R.VTDALNATR.A     | 1 | 2 | 3.3948 | 0.3582 | P63039 |
| K.NAGVEGSLIVEK.I  | 1 | 2 | 4.0535 | 0.5157 | P63039 |
| K.VGGTSDVEVNEK.K  | 1 | 2 | 3.7098 | 0.5549 | P63039 |

16

60 kDa heat shock protein (Hsp60)

|                                  |   |   |        |        |        |
|----------------------------------|---|---|--------|--------|--------|
| K.IGIEIHK.R                      | 1 | 2 | 2.8288 | 0.1015 | P63039 |
| R.IQEITEQLDITTSEYEK.E            | 1 | 2 | 5.6175 | 0.6696 | P63039 |
| R.AAVEEGIVLGGGCALLR.C            | 1 | 2 | 4.0266 | 0.6141 | P63039 |
| K.VGGTSDVEVNEKK.D                | 1 | 2 | 3.9021 | 0.3313 | P63039 |
| K.VGGTSDVEVNEK.K                 | 1 | 2 | 3.1931 | 0.4649 | P63039 |
| K.VGEVIVTK.D                     | 1 | 1 | 2.1555 | 0.3818 | P63039 |
| R.TALLDAAGVASLLTTAEAVVTEIPKEEK.D | 1 | 3 | 5.3828 | 0.6509 | P63039 |
| R.TALLDAAGVASLLTTAEAVVTEIPK.E    | 1 | 2 | 5.1224 | 0.6582 | P63039 |
| K.IGIEIHKR.A                     | 1 | 2 | 3.1164 | 0.1489 | P63039 |
| K.NAGVEGSLIVEK.I                 | 1 | 2 | 3.9017 | 0.4994 | P63039 |

ATP synthase subunit beta ( $\beta$ -ATP)

|                     |   |   |        |        |        |
|---------------------|---|---|--------|--------|--------|
| R.VALTGLTVAEYFR.D   | 1 | 2 | 4.1921 | 0.6195 | P10719 |
| R.LVLEVAQHLGESTVR.T | 1 | 2 | 4.5638 | 0.6099 | P10719 |

17

Glutamate dehydrogenase 1 (GDH)

|                    |   |   |        |        |        |
|--------------------|---|---|--------|--------|--------|
| K.AGVKINPK.N       | 1 | 2 | 2.902  | 0.1954 | P10860 |
| R.GASIVEDKLVEDLK.T | 1 | 2 | 4.7075 | 0.4873 | P10860 |
| R.TAAYVNAIEK.V     | 1 | 2 | 3.1419 | 0.4924 | P10860 |
| R.YSTDVSVDEVK.A    | 1 | 2 | 3.3311 | 0.4571 | P10860 |

Methylmalonate-semialdehyde dehydrogenase (ALDH 6)

|                       |   |   |        |        |        |
|-----------------------|---|---|--------|--------|--------|
| K.LFIDGKFVESK.S       | 1 | 2 | 3.6418 | 0.3484 | Q02253 |
| K.AISFVGSNQAGEYIFER.G | 1 | 2 | 5.1768 | 0.6012 | Q02253 |

18

Enoyl-CoA hydratase

|                           |   |   |        |        |        |
|---------------------------|---|---|--------|--------|--------|
| K.LFYSTFATDDRR.E          | 1 | 2 | 2.8803 | 0.2415 | P14604 |
| K.NSSVGLIQLNR.P           | 1 | 2 | 3.7529 | 0.3867 | P14604 |
| K.IIVAMAK.E               | 1 | 1 | 2.3402 | 0.1133 | P14604 |
| K.AQFGQPEILLGTIPGAGGTQR.L | 1 | 2 | 5.339  | 0.5867 | P14604 |
| K.AFAAGADIK.E             | 1 | 1 | 2.7994 | 0.3958 | P14604 |
| K.NSSVGLIQLNRPK.A         | 1 | 2 | 3.8093 | 0.5287 | P14604 |

19

Enoyl-CoA hydratase

|                           |   |   |        |        |        |
|---------------------------|---|---|--------|--------|--------|
| K.FLSHWDHITR.I            | 1 | 2 | 3.1879 | 0.3333 | P14604 |
| K.AFAAGADIK.E             | 1 | 1 | 2.9651 | 0.3874 | P14604 |
| K.NSSVGLIQLNRPK.A         | 2 | 2 | 3.7799 | 0.4564 | P14604 |
| K.LFYSTFATDDRR.E          | 1 | 2 | 2.7538 | 0.2583 | P14604 |
| K.KLFYSTFATDDRR.E         | 1 | 2 | 3.211  | 0.3003 | P14604 |
| K.ESVNAAFEMTLTEGNKLEK.K   | 1 | 2 | 2.7675 | 0.3264 | P14604 |
| K.AQFGQPEILLGTIPGAGGTQR.L | 1 | 2 | 4.8744 | 0.6113 | P14604 |
| K.LFYSTFATDDR.R           | 1 | 2 | 4.3828 | 0.5384 | P14604 |

Afadin- and alpha-actinin-binding protein (ADIP)

|                    |   |   |        |        |        |
|--------------------|---|---|--------|--------|--------|
| K.NLLAQESVETQNLK.L | 2 | 2 | 3.1734 | 0.1776 | Q8CGZ2 |
|--------------------|---|---|--------|--------|--------|

Glutamate dehydrogenase 1 (GDH)

|                 |   |   |        |        |        |
|-----------------|---|---|--------|--------|--------|
| R.YSTDVSVDEVK.A | 1 | 2 | 3.2148 | 0.4743 | P10860 |
| R.GASIVEDK.L    | 1 | 1 | 2.1628 | 0.2459 | P10860 |

20

Electron transfer flavoprotein subunit beta ( $\beta$ -ETF)

|                           |   |   |        |        |        |
|---------------------------|---|---|--------|--------|--------|
| K.EKVDLLFLGK.Q            | 1 | 2 | 2.9981 | 0.5537 | Q68FU3 |
| R.EIDGGLETIR.L            | 1 | 2 | 2.4728 | 0.3931 | Q68FU3 |
| K.VSVISVEEPPQR.L          | 1 | 2 | 3.7147 | 0.1646 | Q68FU3 |
| K.LPAVVTADLR.L            | 2 | 2 | 3.3482 | 0.5618 | Q68FU3 |
| K.SGVVTDGVK.H             | 1 | 1 | 2.2339 | 0.405  | Q68FU3 |
| R.LKLPAVVTADLR.L          | 1 | 2 | 4.0163 | 0.5582 | Q68FU3 |
| R.GIHVEVPGAEAENLGPLQVAR.V | 1 | 2 | 6.2451 | 0.6792 | Q68FU3 |
| K.VETTEDLVAK.L            | 1 | 1 | 2.2303 | 0.3292 | Q68FU3 |

3-hydroxyacyl-CoA dehydrogenase 2

|                             |   |   |        |        |        |
|-----------------------------|---|---|--------|--------|--------|
| K.GLVAVITGGASGLGLSTAK.R     | 1 | 2 | 5.1952 | 0.647  | O70351 |
| R.VVTIAPGLFATPLLTTLPDK.V    | 2 | 2 | 5.2578 | 0.6654 | O70351 |
| R.VINVNLIGTFNVIR.L          | 1 | 2 | 4.4132 | 0.5909 | O70351 |
| R.NFLASQVPPFSR.L            | 1 | 2 | 3.8556 | 0.419  | O70351 |
| K.NQVHTLEDQR.V              | 1 | 2 | 3.8086 | 0.5486 | O70351 |
| R.LVGQGATAVLLDVPNSEGETEAK.K | 1 | 2 | 5.6652 | 0.5908 | O70351 |

Enoyl-CoA hydratase

|                         |   |   |        |        |        |
|-------------------------|---|---|--------|--------|--------|
| K.ESVNAAFEMTLTEGNKLEK.K | 1 | 2 | 2.8108 | 0.2386 | P14604 |
| K.LFYSTFATDDR.R         | 1 | 2 | 4.2701 | 0.6012 | P14604 |
| K.LFYSTFATDDRR.E        | 1 | 2 | 2.9527 | 0.199  | P14604 |
| K.NSSVGLIQLNRPK.A       | 1 | 2 | 3.6845 | 0.524  | P14604 |
| K.AFAAGADIK.E           | 1 | 1 | 2.9545 | 0.394  | P14604 |

Glutamate dehydrogenase 1 (GDH)

|              |   |   |        |        |        |
|--------------|---|---|--------|--------|--------|
| R.GASIVEDK.L | 1 | 1 | 2.1228 | 0.3116 | P10860 |
|--------------|---|---|--------|--------|--------|

|    |                                                              |   |   |        |        |        |
|----|--------------------------------------------------------------|---|---|--------|--------|--------|
|    | K.IIAEGANGPTTPEADK.I                                         | 1 | 2 | 5.3819 | 0.5421 | P10860 |
|    | R.GASIVEDKLVEDLK.T                                           | 1 | 2 | 4.1037 | 0.347  | P10860 |
|    | R.YSTDVSVDEVK.A                                              | 1 | 2 | 2.4318 | 0.5752 | P10860 |
|    | K.GFIGPGIDVPAPDMSTGER.E                                      | 1 | 2 | 5.2777 | 0.621  | P10860 |
| 21 | <u>Enoyl-CoA hydratase</u>                                   |   |   |        |        |        |
|    | K.AFAAGADIK.E                                                | 1 | 1 | 2.7718 | 0.27   | P14604 |
|    | K.AQFGQPEILLGTIPGAGGTQR.L                                    | 1 | 2 | 4.2866 | 0.5453 | P14604 |
|    | K.NSSVGLIQLNRPK.A                                            | 1 | 2 | 3.6617 | 0.4958 | P14604 |
|    | K.LFYSTFATDDRR.E                                             | 1 | 2 | 2.78   | 0.2611 | P14604 |
|    | <u>Glutamate dehydrogenase 1 (GDH)</u>                       |   |   |        |        |        |
|    | K.IIAEGANGPTTPEADK.I                                         | 1 | 2 | 5.2853 | 0.597  | P10860 |
|    | R.TAAYVNAIEK.V                                               | 1 | 2 | 3.0451 | 0.4828 | P10860 |
| 22 | <u>Enoyl-CoA hydratase</u>                                   |   |   |        |        |        |
|    | K.NSSVGLIQLNRPK.A                                            | 1 | 2 | 2.4712 | 0.2347 | P14604 |
|    | K.AFAAGADIK.E                                                | 2 | 1 | 3.073  | 0.4008 | P14604 |
|    | K.AQFGQPEILLGTIPGAGGTQR.L                                    | 2 | 2 | 4.5569 | 0.5716 | P14604 |
|    | <u>Heat shock protein 75 kDa(HSP 75)</u>                     |   |   |        |        |        |
|    | R.VQDVVTK.Y                                                  | 1 | 1 | 2.3869 | 0.27   | Q5XHZ0 |
|    | K.EELVSNLGTIAR.S                                             | 1 | 2 | 3.5943 | 0.558  | Q5XHZ0 |
|    | R.ELISNASDALEK.L                                             | 1 | 2 | 4.2924 | 0.4409 | Q5XHZ0 |
|    | K.AFLEALQHQ AETSSR.I                                         | 1 | 2 | 5.115  | 0.5326 | Q5XHZ0 |
|    | <u>3-hydroxyacyl-CoA dehydrogenase 2</u>                     |   |   |        |        |        |
|    | R.LVGQGATAVLLDVPNSEGETEAK.K                                  | 1 | 2 | 4.5865 | 0.5659 | O70351 |
|    | R.VVTIAPGLFATPLLTLPDK.V                                      | 2 | 2 | 5.2474 | 0.6785 | O70351 |
|    | <u>Myosin-Ie</u>                                             |   |   |        |        |        |
|    | K.VFIKAPESLFLLEEMR.E                                         | 2 | 2 | 2.7853 | 0.1323 | Q63356 |
| 23 | <u>Enoyl-CoA hydratase</u>                                   |   |   |        |        |        |
|    | K.NSSVGLIQLNRPK.A                                            | 1 | 2 | 3.6478 | 0.4484 | P14604 |
|    | K.FLSHWDHITR.I                                               | 1 | 2 | 3.6082 | 0.4236 | P14604 |
|    | K.AQFGQPEILLGTIPGAGGTQR.L                                    | 2 | 2 | 4.6237 | 0.5741 | P14604 |
|    | K.AFAAGADIK.E                                                | 1 | 1 | 2.6619 | 0.3284 | P14604 |
| 24 | <u>Enoyl-CoA hydratase</u>                                   |   |   |        |        |        |
|    | K.AQFGQPEILLGTIPGAGGTQR.L                                    | 2 | 2 | 4.7709 | 0.6263 | P14604 |
|    | K.NSSVGLIQLNR.P                                              | 1 | 2 | 3.871  | 0.4097 | P14604 |
|    | K.AFAAGADIK.E                                                | 1 | 1 | 3.0459 | 0.3631 | P14604 |
|    | K.NSSVGLIQLNRPK.A                                            | 1 | 2 | 2.5897 | 0.2699 | P14604 |
| 25 | <u>Enoyl-CoA hydratase</u>                                   |   |   |        |        |        |
|    | K.AFAAGADIK.E                                                | 1 | 1 | 2.8177 | 0.3417 | P14604 |
|    | K.AQFGQPEILLGTIPGAGGTQR.L                                    | 1 | 2 | 5.0975 | 0.6019 | P14604 |
| 26 | <u>ATP synthase subunit alpha (<math>\alpha</math> -ATP)</u> |   |   |        |        |        |
|    | R.EAYPGDVFYLSR.L                                             | 1 | 2 | 3.1025 | 0.4596 | P15999 |
|    | R.VVDALGNAIDGK.G                                             | 3 | 2 | 4.0277 | 0.5857 | P15999 |

|                                        |   |   |        |        |        |
|----------------------------------------|---|---|--------|--------|--------|
| R.TGAIVDVPVGDPELLGR.V                  | 3 | 2 | 4.7163 | 0.4889 | P15999 |
| R.FNDGTDEK.K                           | 1 | 1 | 2.3105 | 0.238  | P15999 |
| K.TSIAIDTIINQK.R                       | 1 | 2 | 3.1848 | 0.5199 | P15999 |
| K.TGTAEMSSILEER.I                      | 1 | 2 | 4.0663 | 0.5226 | P15999 |
| K.RFNDGTDEK.K                          | 1 | 2 | 3.0653 | 0.2838 | P15999 |
| R.ILGADTSVDLEETGR.V                    | 2 | 2 | 5.0254 | 0.6313 | P15999 |
| K.RTGAIVDVPVGDPELLGR.V                 | 1 | 2 | 4.543  | 0.4366 | P15999 |
| <u>Glutamate dehydrogenase 1 (GDH)</u> |   |   |        |        |        |
| K.IAEGANGPTTPEADK.I                    | 1 | 2 | 5.0234 | 0.5591 | P10860 |
| K.LQHGSILGFPK.A                        | 1 | 2 | 2.8627 | 0.471  | P10860 |
| <u>Phenylalanine-4-hydroxylase</u>     |   |   |        |        |        |
| K.EEVGALAK.V                           | 1 | 1 | 2.3603 | 0.3037 | P04176 |
| R.NDIGATVHELRS.D                       | 1 | 2 | 3.7814 | 0.4142 | P04176 |

27

|                                                              |   |   |        |        |        |
|--------------------------------------------------------------|---|---|--------|--------|--------|
| <u>ATP synthase subunit alpha (<math>\alpha</math> -ATP)</u> |   |   |        |        |        |
| R.TGAIVDVPVGDPELLGR.V                                        | 1 | 2 | 4.4644 | 0.4812 | P15999 |
| R.ILGADTSVDLEETGR.V                                          | 1 | 2 | 4.9121 | 0.6229 | P15999 |
| R.EVAFAAQFGSDLDAATQQLLSR.G                                   | 1 | 2 | 7.226  | 0.6781 | P15999 |
| R.EAYPGDVFYLHSR.L                                            | 1 | 2 | 3.3349 | 0.5381 | P15999 |
| K.TSIAIDTIINQK.R                                             | 1 | 2 | 4.3814 | 0.5085 | P15999 |
| K.LELAQYR.E                                                  | 1 | 1 | 2.1069 | 0.1745 | P15999 |
| K.ISEQSDAK.L                                                 | 1 | 1 | 2.3278 | 0.1796 | P15999 |
| K.GIRPAINVGLSVSR.V                                           | 1 | 2 | 3.8047 | 0.5525 | P15999 |
| <u>Methylmalonate-semialdehyde dehydrogenase (ALDH 6)</u>    |   |   |        |        |        |
| K.ENTLNQLVGAAFGAAGQR.C                                       | 1 | 2 | 4.8798 | 0.543  | Q02253 |
| K.AISFVGSNQAGEYIFER.G                                        | 1 | 2 | 5.4146 | 0.5661 | Q02253 |

28

|                                                                |   |   |        |        |        |
|----------------------------------------------------------------|---|---|--------|--------|--------|
| <u>ATP synthase subunit alpha (<math>\alpha</math> -ATP)</u>   |   |   |        |        |        |
| K.ISEQSDAK.L                                                   | 1 | 1 | 2.4896 | 0.0909 | P15999 |
| K.TSIAIDTIINQK.R                                               | 1 | 2 | 4.4971 | 0.4598 | P15999 |
| R.VVDALGNAIDGK.G                                               | 1 | 2 | 3.3385 | 0.594  | P15999 |
| R.TGAIVDVPVGDPELLGR.V                                          | 1 | 2 | 4.6244 | 0.5008 | P15999 |
| R.EAYPGDVFYLHSR.L                                              | 2 | 2 | 3.5289 | 0.5832 | P15999 |
| K.EIVTNFLAGFEP.-                                               | 1 | 2 | 3.7166 | 0.6176 | P15999 |
| R.EVAFAAQFGSDLDAATQQLLSR.G                                     | 1 | 2 | 2.9732 | 0.5724 | P15999 |
| K.GIRPAINVGLSVSR.V                                             | 1 | 2 | 4.2434 | 0.5572 | P15999 |
| <u>cAMP-specific 3',5'-cyclic phosphodiesterase 4B (DPDE4)</u> |   |   |        |        |        |
| R.DSLEETDIDIATEDKSLIDT.-                                       | 1 | 2 | 2.632  | 0.1184 | P14646 |
| R.DSLEETDIDIATEDK.S                                            | 1 | 2 | 3.118  | 0.1348 | P14646 |

29

|                                                              |   |   |        |        |        |
|--------------------------------------------------------------|---|---|--------|--------|--------|
| <u>ATP synthase subunit alpha (<math>\alpha</math> -ATP)</u> |   |   |        |        |        |
| K.FESAFLSHVVSQHQSLLGNIR.S                                    | 1 | 2 | 6.0718 | 0.6215 | P15999 |
| R.VLSIGDGIAR.V                                               | 1 | 2 | 2.4238 | 0.2582 | P15999 |
| R.VGSAAQTR.A                                                 | 1 | 1 | 2.2165 | 0.1708 | P15999 |
| K.GIRPAINVGLSVSR.V                                           | 1 | 2 | 3.7678 | 0.5185 | P15999 |
| K.EIVTNFLAGFEP.-                                             | 1 | 2 | 4.0103 | 0.5297 | P15999 |
| R.EVAFAAQFGSDLDAATQQLLSR.G                                   | 1 | 2 | 7.3721 | 0.6619 | P15999 |
| <u>Afadin- and alpha-actinin-binding protein (ADIP)</u>      |   |   |        |        |        |
| K.NLLAQESVETQNLK.L                                           | 2 | 2 | 3.3773 | 0.1529 | Q8CGZ2 |
| <u>ATP synthase D chain</u>                                  |   |   |        |        |        |
| R.ANVDPKPLVDDFK.N                                            | 1 | 2 | 4.0452 | 0.4884 | P31399 |

|    |                                                             |   |   |        |        |        |
|----|-------------------------------------------------------------|---|---|--------|--------|--------|
|    | K.YTALVDAEEKEDVK.N                                          | 1 | 2 | 4.7678 | 0.5228 | P31399 |
| 30 | <u>ATP synthase subunit alpha (<math>\alpha</math>-ATP)</u> |   |   |        |        |        |
|    | K.EIVTNFLAGFEP.-                                            | 1 | 2 | 3.3365 | 0.5588 | P15999 |
|    | R.EVAAFAQFGSDLDAATQQLLSR.G                                  | 1 | 2 | 7.2176 | 0.6516 | P15999 |
|    | R.PAINVGLSVSR.V                                             | 1 | 2 | 2.8538 | 0.5013 | P15999 |
|    | R.VGSAAQTR.A                                                | 1 | 1 | 2.3778 | 0.2507 | P15999 |
|    | K.ISEQSDAK.L                                                | 1 | 1 | 2.2456 | 0.1699 | P15999 |
|    | K.GIRPAINVGLSVSR.V                                          | 1 | 2 | 4.1348 | 0.5665 | P15999 |
|    | K.FESAFLSHVVSQHQSLLGNIR.S                                   | 1 | 2 | 6.7761 | 0.6161 | P15999 |
| 31 | <u>Glutamate dehydrogenase 1 (GDH)</u>                      |   |   |        |        |        |
|    | K.IIAEGANGPTTPEADK.I                                        | 1 | 2 | 5.3963 | 0.5978 | P10860 |
|    | K.IIAEGANGPTTPEADKIFLER.N                                   | 1 | 2 | 5.3201 | 0.638  | P10860 |
|    | K.LQHGSILGFPK.A                                             | 1 | 2 | 2.94   | 0.5756 | P10860 |
|    | <u>Methylmalonate-semialdehyde dehydrogenase (ALDH 6)</u>   |   |   |        |        |        |
|    | K.TLADAEGDVFR.G                                             | 1 | 2 | 3.7022 | 0.4517 | Q02253 |
|    | R.LITLEQ GK.T                                               | 1 | 1 | 2.1741 | 0.2095 | Q02253 |
|    | R.AFP AWADTSILSR.Q                                          | 1 | 2 | 4.1497 | 0.5859 | Q02253 |
| 32 | <u>Methylmalonate-semialdehyde dehydrogenase (ALDH 6)</u>   |   |   |        |        |        |
|    | K.TLADAEGDVFR.G                                             | 1 | 2 | 3.415  | 0.4202 | Q02253 |
|    | R.AFP AWADTSILSR.Q                                          | 1 | 2 | 3.5938 | 0.5414 | Q02253 |
| 33 | <u>60 kDa heat shock protein (Hsp60)</u>                    |   |   |        |        |        |
|    | R.CIPALDSLKPANEDQK.I                                        | 1 | 2 | 2.7488 | 0.3279 | P63039 |
|    | K.KISSVQSIVPALEIANAHR.K                                     | 1 | 2 | 5.4475 | 0.5664 | P63039 |
|    | K.ISSVQSIVPALEIANAHR.K                                      | 2 | 2 | 4.6672 | 0.6229 | P63039 |
|    | K.TLNDELEIIEGMK.F                                           | 1 | 2 | 4.439  | 0.5017 | P63039 |
|    | R.VTDALNATR.A                                               | 1 | 2 | 3.7144 | 0.4025 | P63039 |
|    | K.VGEVIVTK.D                                                | 1 | 1 | 2.2298 | 0.3337 | P63039 |
|    | R.TALLDAAGVASLLTTAEAVVTEIPKEEK.D                            | 2 | 3 | 5.4723 | 0.6527 | P63039 |
|    | R.AAVEEGIVLGGGCALLR.C                                       | 1 | 2 | 4.3346 | 0.5455 | P63039 |
|    | R.GVMLAVDAVIAELK.K                                          | 1 | 2 | 5.1419 | 0.444  | P63039 |
|    | R.GYISPYFINTSK.G                                            | 1 | 2 | 3.3973 | 0.5861 | P63039 |
|    | R.IQEITEQLDITTSEYEK.E                                       | 1 | 2 | 6.0982 | 0.6352 | P63039 |
|    | R.KPLVIIAEDVDGEALSTLVNLR.L                                  | 3 | 2 | 7.5591 | 0.7389 | P63039 |
|    | R.TALLDAAGVASLLTTAEAVVTEIPK.E                               | 2 | 2 | 7.0166 | 0.7234 | P63039 |
|    | K.LVQDVANNTNEEAGDGTATVLR.S                                  | 1 | 2 | 6.6826 | 0.7238 | P63039 |
|    | K.VGLQVVAVK.A                                               | 2 | 1 | 3.6445 | 0.306  | P63039 |
|    | <u>Cytochrome b5</u>                                        |   |   |        |        |        |
|    | R.EQAGGDATENFEDVGHSTDAR.E                                   | 1 | 2 | 5.3087 | 0.6508 | P00173 |
|    | K.FLEEHPGGEVLR.E                                            | 1 | 2 | 3.9176 | 0.44   | P00173 |
|    | K.TYIIGELHPDDR.S                                            | 2 | 2 | 4.1482 | 0.5934 | P00173 |
|    | K.YYTLLEIQK.H                                               | 1 | 2 | 2.9845 | 0.4535 | P00173 |
|    | <u>Afadin- and alpha-actinin-binding protein (ADIP)</u>     |   |   |        |        |        |
|    | K.NLLAQESVETQNLK.L                                          | 2 | 1 | 2.6799 | 0.1733 | Q8CGZ2 |
|    | <u>cGMP-dependent protein kinase 2</u>                      |   |   |        |        |        |
|    | R.WLNGFNWEGLKAR.S                                           | 1 | 2 | 3.6077 | 0.1493 | Q64595 |
|    | K.LITDALNKNQFLK.R                                           | 1 | 2 | 3.4341 | 0.2285 | Q64595 |

|                                                                                        |   |   |        |        |  |        |
|----------------------------------------------------------------------------------------|---|---|--------|--------|--|--------|
| <u>Glutamate dehydrogenase 1 (GDH)</u>                                                 |   |   |        |        |  |        |
| K.IIAEGANGPTTPEADK.I                                                                   | 1 | 2 | 4.9333 | 0.592  |  | P10860 |
| K.LQHGSILGFPK.A                                                                        | 1 | 2 | 3.3906 | 0.525  |  | P10860 |
| <u>Thyroid receptor-interacting protein 13</u>                                         |   |   |        |        |  |        |
| K.MFQKIQDLIDDK.E                                                                       | 2 | 2 | 2.8475 | 0.1311 |  | Q5XHZ9 |
| <u>10 kDa heat shock protein (Hsp10)</u>                                               |   |   |        |        |  |        |
| K.GGEIQPVSVKVGDK.V                                                                     | 2 | 2 | 2.507  | 0.1302 |  | P26772 |
| <u>DNA polymerase subunit gamma 1 (Mitochondrial DNA polymerase catalytic subunit)</u> |   |   |        |        |  |        |
| K.MEDGTLQAGPGGAR.G                                                                     | 2 | 2 | 2.4528 | 0.0859 |  | Q9QYV8 |

- Charge state of the peptide molecular ion chosen for MS/MS
- SEQUEST cross correlation score
- SEQUEST delta correlation score
- Swiss-Prot protein accession references

**In-gel digestion and nanoLC-MS/MS Analysis.** The silver-stained 2D gel spots were destained using the destaining solutions from Invitrogen. After destaining, the gel spots were digested with 15 ng/ $\mu$ L of trypsin (Promega, Madison, WI) overnight at 37 °C, and the peptides were extracted by 70% acetonitrile and 0.1% trifluoroacetic acid (TFA) with sonication. The extracted peptides were analyzed by reversed-phase nanoLC-tandem mass spectrometry (RP nanoLC-MS/MS). RP nanoLC-MS/MS was performed using an Agilent 1100 nanoLC system (Agilent Technologies) coupled online to a linear ion trap mass spectrometer (LTQ, Thermo Electron). Reversed-phase separations of each sample were performed using 75  $\mu$ m i.d x 360 o.d. x 10 cm long fused silica capillary columns (Polymicro Technologies) that were slurry packed in house with Jupiter 5  $\mu$ m, 300 Å pore size C18 silica-bonded stationary phase (Phenomenex, Torrance, CA). After injecting 5  $\mu$ L of sample, the column was washed for 20 min with 98% solvent A (0.1% formic acid in water, v/v) and peptides were eluted at a flow rate of 0.25  $\mu$ L/min using step linear gradients of 2%-42% solvent B (0.1% formic acid in 100% acetonitrile, v/v) for 40 min and 42%-98% solvent B for 10 min followed by 98% solvent B for 10 min. The mass spectrometer was operated in a data dependent mode in which each full MS scan was followed by 7 MS/MS scans where the 7 most abundant peptide molecular ions were dynamically selected from the prior MS scan for collision-induced dissociation (CID) using a normalized collision energy of 35%. The temperature of the heated capillary and electrospray voltage were 160 °C and 1.5 kV, respectively. The raw MS/MS data were searched using SEQUEST (ThermoFinnigan, San Jose, CA) against a rat protein database from European Bioinformatics Institute (<http://www.ebi.ac.uk/proteome/index.html>) to identify peptides. False positive rate in peptide identification was evaluated using the method described previously [1], which resulted in a confidence level of more than 95% in positive identifications.

(1) Yu, L.R., Conrads, T.P., Uo, T., Kinoshita, Y., Morrison, R.S., Lucas, D.A., Chan, K.C., Blonder, J., Issaq, H.J., and Veenstra, T.D. (2004) *Mol. Cell. Proteomics*. **3**, 896-907.
